# Supplementary material for: Comparative Analysis of Fcγ and Complement Receptors Presence on Monocytes in Pulmonary Sarcoidosis and Tuberculosis
Source: MDPI journal article supplement (doi:10.3390/ijms24119713), 2023-06-03
Supplement: s1 [file s1]

Supplementary Materials to article:

## **Comparative Analysis of Fc $\gamma$ and Complement Receptors Presence on Monocytes in Pulmonary Sarcoidosis and Tuberculosis**

**Marlena Typiak <sup>1</sup>, Piotr Trzonkowski <sup>2</sup> Monika Skotarczak <sup>3</sup> and Anna Dubaniewicz <sup>4,\*</sup>**

<sup>1</sup> Department of General and Medical Biochemistry, Faculty of Biology, University of Gdansk, Wita Stwosza 59 St., 80-308, Gdansk, Poland; marlena.typiak@ug.edu.pl

<sup>2</sup> Department of Medical Immunology, Medical University of Gdansk, Debinki 7 St, 80-211, Gdansk, Poland

<sup>3</sup> 1st Department of Radiology, Medical University of Gdansk, Mariana Smoluchowskiego 17 St., 80-214, Gdansk, Poland

<sup>4</sup> Department of Pulmonology, Medical University of Gdansk, Mariana Smoluchowskiego 17 St., 80-214, Gdansk, Poland

\* Correspondence: aduban@gumed.edu.pl

Table S1. Percentage (%) and total number (N) of CD64<sup>+</sup>, CD32<sup>+</sup>, CD16<sup>+</sup> and CD35<sup>+</sup>, CD11b<sup>+</sup>, CD11c<sup>+</sup> monocytes in the peripheral blood of patients with sarcoidosis (SA), patients with tuberculosis (TB) and healthy controls (Cont.) - comparisons between monocytes with particular receptors. The provided p values are for comparisons made with t Student statistical test.

| The tested parameter |     | CD35          | CD11b         | CD11c         | p value |
|----------------------|-----|---------------|---------------|---------------|---------|
| Cont.                | (%) |               | 90.71 ± 13.76 | 89.08 ± 9.44  | 0.45    |
| TB                   | (%) |               | 93.90 ± 6.18  | 87.29 ± 9.49  | 0.0001  |
| SA                   | (%) |               | 87.87 ± 15.63 | 78.96 ± 21.18 | 0.006   |
| Cont.                | (%) | 81.23 ± 14.34 | 90.71 ± 13.76 |               | 0.0003  |
| TB                   | (%) | 84.56 ± 8.27  | 93.90 ± 6.18  |               | 0.0001  |
| SA                   | (%) | 69.39 ± 23.30 | 87.87 ± 15.63 |               | 0.0001  |
| Cont.                | (%) | 81.23 ± 14.34 |               | 89.08 ± 9.44  | 0.0006  |
| TB                   | (%) | 84.56 ± 8.27  |               | 87.29 ± 9.49  | 0.14    |
| SA                   | (%) | 69.39 ± 23.30 |               | 78.96 ± 21.18 | 0.01    |
| Cont.                | (N) |               | 0.44 ± 0.11   | 0.43 ± 0.09   | 0.53    |
| TB                   | (N) |               | 0.54 ± 0.19   | 0.50 ± 0.19   | 0.37    |
| SA                   | (N) |               | 0.55 ± 0.30   | 0.48 ± 0.25   | 0.13    |
| Cont.                | (N) | 0.39 ± 0.09   | 0.44 ± 0.11   |               | 0.006   |
| TB                   | (N) | 0.49 ± 0.18   | 0.54 ± 0.19   |               | 0.19    |
| SA                   | (N) | 0.44 ± 0.25   | 0.55 ± 0.30   |               | 0.02    |
| Cont.                | (N) | 0.39 ± 0.09   |               | 0.43 ± 0.09   | 0.01    |
| TB                   | (N) | 0.49 ± 0.18   |               | 0.50 ± 0.19   | 0.69    |
| SA                   | (N) | 0.44 ± 0.25   |               | 0.48 ± 0.25   | 0.34    |

Table S1 continued

| The tested parameter |     | CD64         | CD32          | CD16          | p value |
|----------------------|-----|--------------|---------------|---------------|---------|
| Cont.                | (%) | 4.30 ± 11.97 | 34.16 ± 17.58 |               | 0.0001  |
| TB                   | (%) | 7.71 ± 12.99 | 43.11 ± 17.51 |               | 0.0001  |
| SA                   | (%) | 5.86 ± 6.89  | 41.85 ± 20.05 |               | 0.0001  |
| Cont.                | (%) | 4.30 ± 11.97 |               | 9.09 ± 16.37  | 0.07    |
| TB                   | (%) | 7.71 ± 12.99 |               | 13.32 ± 20.98 | 0.13    |
| SA                   | (%) | 5.86 ± 6.89  |               | 14.65 ± 17.29 | 0.0002  |
| Cont.                | (%) |              | 34.16 ± 17.58 | 9.09 ± 16.37  | 0.0001  |
| TB                   | (%) |              | 43.11 ± 17.51 | 13.32 ± 20.98 | 0.0001  |
| SA                   | (%) |              | 41.85 ± 20.05 | 14.65 ± 17.29 | 0.0001  |
| Cont.                | (N) | 0.02 ± 0.07  | 0.17 ± 0.10   |               | 0.0001  |
| TB                   | (N) | 0.05 ± 0.09  | 0.25 ± 0.14   |               | 0.0001  |
| SA                   | (N) | 0.03 ± 0.04  | 0.26 ± 0.18   |               | 0.0001  |
| Cont.                | (N) | 0.02 ± 0.07  |               | 0.05 ± 0.10   | 0.06    |
| TB                   | (N) | 0.05 ± 0.09  |               | 0.05 ± 0.10   | 0.92    |
| SA                   | (N) | 0.03 ± 0.04  |               | 0.05 ± 0.07   | 0.0475  |
| Cont.                | (N) |              | 0.17 ± 0.10   | 0.05 ± 0.10   | 0.0001  |
| TB                   | (N) |              | 0.25 ± 0.14   | 0.05 ± 0.10   | 0.0001  |
| SA                   | (N) |              | 0.26 ± 0.18   | 0.05 ± 0.07   | 0.0001  |

Table S2. Percentage (%) and total number (N) of CD64<sup>+</sup>, CD32<sup>+</sup>, CD16<sup>+</sup> and CD35<sup>+</sup>, CD11b<sup>+</sup>, CD11c<sup>+</sup> monocytes in the peripheral blood of patients with sarcoidosis (SA), patients with tuberculosis (TB) and healthy controls (Cont.) - comparisons between the tested groups. The provided p values are for comparisons made with the Mann-Whitney U test.

| Parameter            | Study group |             |        |             |        |             | p value for  |           |              |
|----------------------|-------------|-------------|--------|-------------|--------|-------------|--------------|-----------|--------------|
|                      | Cont.       |             | SA     |             | TB     |             | SA vs. Cont. | SA vs. TB | TB vs. Cont. |
|                      | median      | min-max     | median | min-max     | median | min-max     |              |           |              |
| % CD64 <sup>+</sup>  | 0.50        | 0-62.85     | 2.95   | 0-37.97     | 1.15   | 0-50.07     | 0.0001       | 0.08      | 0.0005       |
| % CD32 <sup>+</sup>  | 31.60       | 0-70.50     | 41.62  | 0.47-97.58  | 40.75  | 0-90.29     | 0.02         | 0.84      | 0.008        |
| % CD16 <sup>+</sup>  | 3.41        | 0-72.25     | 6.75   | 0.30-62.64  | 2.62   | 0-72.17     | 0.002        | 0.02      | 0.78         |
| N CD64 <sup>+</sup>  | 0.00        | 0-0.37      | 0.02   | 0-0.22      | 0.007  | 0-0.43      | 0.0001       | 0.09      | 0.0005       |
| N CD32 <sup>+</sup>  | 0.15        | 0-0.46      | 0.25   | 0.001-1.17  | 0.21   | 0-0.56      | 0.002        | 0.86      | 0.0008       |
| N CD16 <sup>+</sup>  | 0.01        | 0-0.41      | 0.027  | 0.0006-0.30 | 0.015  | 0-0.46      | 0.12         | 0.46      | 0.35         |
| % CD35 <sup>+</sup>  | 87.16       | 34.62-99.06 | 74.06  | 12.50-99.64 | 85.61  | 62.59-98.05 | 0.01         | 0.004     | 0.64         |
| % CD11b <sup>+</sup> | 93.00       | 0-100       | 94.86  | 34.26-100   | 95.55  | 72.02-100   | 0.72         | 0.11      | 0.09         |
| % CD11c <sup>+</sup> | 91.40       | 60.08-100   | 86.63  | 9.91-100    | 89.41  | 63.67-99.61 | 0.008        | 0.11      | 0.24         |
| N CD35 <sup>+</sup>  | 0.40        | 0.13-0.60   | 0.43   | 0.04-1.18   | 0.5    | 0.21-0.84   | 0.44         | 0.1       | 0.01         |
| N CD11b <sup>+</sup> | 0.47        | 0-0.61      | 0.53   | 0.12-1.49   | 0.55   | 0.23-0.91   | 0.047        | 0.68      | 0.01         |
| N CD11c <sup>+</sup> | 0.44        | 0.14-0.60   | 0.48   | 0.06-1.20   | 0.51   | 0.20-0.87   | 0.19         | 0.31      | 0.1          |

Table S3. Percentage (%) and total number (N) of monocytes with or without CD64, CD32, CD16 and CD35, CD11b, CD11c receptors, in the peripheral blood of patients with sarcoidosis (SA), patients with tuberculosis (TB) and healthy controls (Cont.) - comparisons between the tested groups. Due to the high number of possible phenotypes of the cells, only significant or nearly significant comparisons are presented in the table.

| Parameter                              | Study group |               |             |               |             |               | p value for  |           |              |                |
|----------------------------------------|-------------|---------------|-------------|---------------|-------------|---------------|--------------|-----------|--------------|----------------|
|                                        | Cont.       |               | SA          |               | TB          |               | SA vs. Cont. | SA vs. TB | TB vs. Cont. | test           |
|                                        | median/mean | min-max/SD    | median/mean | min-max/SD    | median/mean | min-max/SD    |              |           |              |                |
| % CD64 <sup>+</sup> CD35 <sup>+</sup>  | 0.34        | 0 - 17.70     | 2.6         | 0 - 0.16      | 0.96        | 0 - 37.21     | 0.002        | 0.15      | 0.06         | U Mann-Whitney |
| % CD64 <sup>+</sup> CD35 <sup>+</sup>  | 80.18       | 33.90 - 95.74 | 68.22       | 14.81 - 93.75 | 79.66       | 12.52 - 95.83 | 0.03         | 0.09      | 0.91         | U Mann-Whitney |
| % CD64 <sup>+</sup> CD11b <sup>+</sup> | 0.64        | 0 - 40.03     | 4.6         | 0 - 26.58     | 1.26        | 0.41 - 28.57  | 0.003        | 0.14      | 0.07         | U Mann-Whitney |
| % CD64 <sup>+</sup> CD11c <sup>+</sup> | 0.42        | 0 - 57.14     | 1.47        | 0 - 12.50     | 1.62        | 0 - 14.50     | 0.01         | 0.9       | 0.02         | U Mann-Whitney |
| % CD32 <sup>+</sup> CD35 <sup>+</sup>  | 23.91       | 17.57         | 27.19       | 14.47         | 34.42       | 13.84         | 0.53         | 0.16      | 0.07         | t Student      |
| % CD32 <sup>+</sup> CD35 <sup>+</sup>  | 55.1        | 16.67 - 84.85 | 38.84       | 0.91 - 84.88  | 52.67       | 3.99 - 66.71  | 0.03         | 0.08      | 0.32         | U Mann-Whitney |
| % CD32 <sup>+</sup> CD11b <sup>+</sup> | 57.77       | 21.14         | 43.59       | 21.92         | 55.5        | 21.23         | 0.047        | 0.1       | 0.56         | t Student      |
| % CD32 <sup>+</sup> CD11c <sup>+</sup> | 60.39       | 15.7          | 35.71       | 25.22         | 51.32       | 22.71         | 0.0009       | 0.07      | 0.2          | t Student      |
| % CD16 <sup>+</sup> CD35 <sup>-</sup>  | 0.23        | 0 - 2.68      | 3.23        | 0 - 34.10     | 0.19        | 0 - 1.99      | 0.0001       | 0.0002    | 0.62         | U Mann-Whitney |
| N CD16 <sup>+</sup> CD35 <sup>-</sup>  | 0.001       | 0 - 0.02      | 0.01        | 0 - 0.18      | 0.001       | 0 - 0.006     | 0.0001       | 0.0002    | 0.9          | U Mann-Whitney |
